# Supplementary material
Source: Research Square preprint supplement (doi:10.21203/rs.3.rs-9527345/v1)
Supplement: Supplementary file 1 [file dc30ebf04a9ac02b267fb519.docx]

# Additional file 1. Supplementary tables

Supplementary material for: Admission BNP-dominant biomarker phenotypes and in-hospital heart failure or cardiogenic shock in STEMI: a retrospective research note.

## Table S1. Selected baseline characteristics according to in-hospital HF/CS.

| **Variable** | **Overall** | **No HF/CS** | **HF/CS** | **P value** |
| --- | --- | --- | --- | --- |
| Age, years | 68.5 [55.0, 78.0] | 61.5 [49.8, 71.3] | 75.0 [64.5, 81.0] | <0.001 |
| BNP, pg/mL | 372 [194.5, 837] | 233 [147.3, 396.5] | 848 [395.5, 1390.5] | <0.001 |
| D-dimer, ug/mL | 0.56 [0.29, 1.25] | 0.35 [0.22, 0.73] | 0.97 [0.44, 1.76] | <0.001 |
| hs-CRP, mg/L | 9.15 [2.52, 32.16] | 4.55 [1.88, 21.56] | 11.49 [4.00, 52.01] | 0.008 |
| Creatinine, umol/L | 76.4 [62.7, 99.1] | 72.4 [59.7, 84.4] | 84.2 [70.2, 115.0] | 0.002 |
| LVEF, % | 52 [46, 56] | 54 [50, 58] | 50 [42, 54.8] | <0.001 |
| Male sex | 109/140 (77.9%) | 66/76 (86.8%) | 43/64 (67.2%) | 0.010 |
| Anemia | 30/140 (21.4%) | 11/76 (14.5%) | 19/64 (29.7%) | 0.048 |

## Table S2. Primary multivariable models for in-hospital HF/CS.

| **Model** | **Exposure** | **Adjusted OR (95% CI)** | **P value** | **AUC** | **Brier** |
| --- | --- | --- | --- | --- | --- |
| Clinical base | None | - | - | 0.807 | 0.176 |
| Clinical + ln(BNP) | BNP per 1 SD | 3.75 (1.86-7.60) | <0.001 | 0.859 | 0.147 |
| Clinical + ln(D-dimer) | D-dimer per 1 SD | 1.57 (0.90-2.73) | 0.111 | 0.822 | 0.172 |
| Clinical + burden score | Burden score per 1 SD | 4.04 (1.84-8.92) | <0.001 | 0.849 | 0.154 |
| Clinical + ln(BNP) + ln(D-dimer) | BNP; D-dimer per 1 SD | 3.76 (1.85-7.65); 1.51 (0.82-2.76) | <0.001; 0.185 | 0.862 | 0.146 |

## Table S3. Phenotype analysis based on admission BNP and D-dimer.

| **Phenotype** | **N** | **Events** | **Event rate** | **Adjusted OR (95% CI)** | **P value** |
| --- | --- | --- | --- | --- | --- |
| Low BNP / low D-dimer | 46 | 10 | 21.7% | Reference | - |
| High BNP / low D-dimer | 21 | 9 | 42.9% | 2.01 (0.56-7.20) | 0.281 |
| Low BNP / high D-dimer | 22 | 5 | 22.7% | 0.54 (0.12-2.50) | 0.435 |
| High BNP / high D-dimer | 47 | 38 | 80.9% | 6.75 (1.75-26.10) | 0.006 |

## Table S4. Testing-pattern comparison cohort.

| **Variable** | **BNP unavailable** | **BNP available** | **P value** |
| --- | --- | --- | --- |
| Age, years | 61.0 [52.3, 72.0] | 68.0 [55.0, 78.0] | 0.003 |
| Male sex | 260/322 (80.7%) | 108/139 (77.7%) | 0.534 |
| LVEF, % | 52 [45, 58] | 52 [46.5, 56] | 0.858 |
| Creatinine, umol/L | 74.6 [61.2, 94.2] | 76.3 [62.5, 99.6] | 0.442 |
| HF/CS composite | 145/322 (45.0%) | 63/139 (45.3%) | 1.000 |
| In-hospital death | 19/322 (5.9%) | 6/139 (4.3%) | 0.642 |
| Cardiogenic shock | 54/322 (16.8%) | 13/139 (9.4%) | 0.054 |
| Heart failure | 142/322 (44.1%) | 62/139 (44.6%) | 1.000 |
